# Supplementary material
Source: publisher site journal article supplement (https://www.dovepress.com/article/442913)
Supplement: Supplementary file 1 [file get_supplementary_file.php]

**Appendix-1**

**Patient Data Collection Form**

RN NO.

DATE

Case Type: ICU

GENERAL WARDS

Severity: Mild   
Moderate   
Severe

Asymptomatic: Yes   
No

Ward Name: Medical   
Surgical   
O&G   
Orthopaedic   
Psychiatric   
Others  (Please state): \_\_\_\_\_

**SECTION ONE: SOCIO DEMOGRAPHIC INFORMATION**

1. Patient ID

2. Sex: Male  Female

3. Age: \_\_\_\_\_ or Date of Birth: Day   Month   Year

4. Nationality: Kuwaiti  Non-Kuwaiti

5. Marital status

Single  Married  Divorced

Others  (Please state): \_\_\_\_\_

6. Level of Education

Primary school  Secondary school  Diploma  Degree

Others  (Please state): \_\_\_\_\_

7. Residence

Capital City  Farwaniya  Hawally

Jahra  Ahmadi  Mubarak Alkabeer

**SECTION TWO: MEDICAL BACKGROUND**

8. Date of admission to Hospital: \_\_\_\_/\_\_\_\_/\_\_\_\_

9. Date of discharge from Hospital: \_\_\_\_/\_\_\_\_/\_\_\_\_

10. Symptoms on Admission:

| Symptoms                                 | Yes | No |
|------------------------------------------|-----|----|
| Fever                                    |     |    |
| Cough                                    |     |    |
| Shortness of Breath/Breathing Difficulty |     |    |
| Sore Throat                              |     |    |
| Muscle Pain                              |     |    |
| Running Nose                             |     |    |
| Fatigue                                  |     |    |
| Abdominal Pain                           |     |    |
| Headache                                 |     |    |
| Diarrhea                                 |     |    |
| Others: (Please State)                   |     |    |
| Others: (Please State)                   |     |    |
| Others: (Please State)                   |     |    |

11. Date of Admission to ICU: \_\_\_\_/\_\_\_\_/\_\_\_\_

12. Date of Discharge from ICU:

13. Number of Days on Mechanical Ventilator:

14. Discharge Status:
- a) Recovered
  - b) Transfer to other hospital
  - c) Died
  - d) Others: Please Specify \_\_\_\_\_

**15. Diagnosis**

| No | Types of Diagnosis     | Name of Diagnosis | ICD-10 codes (WHO) |
|----|------------------------|-------------------|--------------------|
| 1  | Primary Diagnosis      |                   |                    |
| 2  | Secondary Diagnosis 1  |                   |                    |
| 3  | Secondary Diagnosis 2  |                   |                    |
| 4  | Secondary Diagnosis 3  |                   |                    |
| 5  | Secondary Diagnosis 4  |                   |                    |
| 6  | Secondary Diagnosis 5  |                   |                    |
| 7  | Secondary Diagnosis 6  |                   |                    |
| 8  | Secondary Diagnosis 7  |                   |                    |
| 9  | Secondary Diagnosis 8  |                   |                    |
| 10 | Secondary Diagnosis 9  |                   |                    |
| 11 | Secondary Diagnosis 10 |                   |                    |

**16. Procedures:**

| No | Procedure name | Procedure Codes (ICD-9-CM) |
|----|----------------|----------------------------|
| 1  |                |                            |
| 2  |                |                            |
| 3  |                |                            |
| 4  |                |                            |
| 5  |                |                            |
| 6  |                |                            |
| 7  |                |                            |
| 8  |                |                            |
| 9  |                |                            |
| 10 |                |                            |

**17. Laboratory Investigations**

| Type of laboratory investigations |                              | Count [+++] |
|-----------------------------------|------------------------------|-------------|
| 1                                 | PCR for COVID-19             |             |
| 2.                                | Elisa/RapidTest for COVID-19 |             |
| 3.                                | General                      |             |
|                                   | Full blood count             |             |
|                                   | Full blood picture           |             |
|                                   | Haemoglobin                  |             |
|                                   | MCV or MCHC or MCH           |             |
|                                   | PCV [haematocrit value]      |             |
|                                   | Platelet count               |             |





**20. Treatment Oral:**

| <b>Name of Drugs</b> | <b>Quantity<br/>[No. of<br/>tablet]</b> | <b>Frequenc<br/>y/day</b> | <b>Durati<br/>on<br/>[days]</b> | <b>Total<br/>given</b> |
|----------------------|-----------------------------------------|---------------------------|---------------------------------|------------------------|
| 1.                   |                                         |                           |                                 |                        |
| 2.                   |                                         |                           |                                 |                        |
| 3                    |                                         |                           |                                 |                        |
| 4                    |                                         |                           |                                 |                        |
| 5                    |                                         |                           |                                 |                        |
| 6                    |                                         |                           |                                 |                        |
| 7                    |                                         |                           |                                 |                        |
| 8                    |                                         |                           |                                 |                        |
| 9                    |                                         |                           |                                 |                        |
| 10                   |                                         |                           |                                 |                        |

**21. Treatment Parenteral:**

| <b>Name of drugs</b> | <b>Quantity<br/>[No. of<br/>tablet]</b> | <b>Frequenc<br/>y/day</b> | <b>Durati<br/>on<br/>[days]</b> | <b>Total<br/>given</b> |
|----------------------|-----------------------------------------|---------------------------|---------------------------------|------------------------|
| 1                    |                                         |                           |                                 |                        |
| 2                    |                                         |                           |                                 |                        |
| 3                    |                                         |                           |                                 |                        |
| 4                    |                                         |                           |                                 |                        |
| 5                    |                                         |                           |                                 |                        |
| 6                    |                                         |                           |                                 |                        |
| 7                    |                                         |                           |                                 |                        |
| 8                    |                                         |                           |                                 |                        |
| 9                    |                                         |                           |                                 |                        |





## Appendix-2: Costing Data Collection Tool

| Cost Centre                      | No of Staff | No of Nurses | Inpatient Days | Number of Discharges | Nos. of Visits | ALOS | Operating Cost (Exc. Salary) | Annual Staff Salary | Equipment /furnitures /Vehicles purchased last 5 Years | Floor Area (m <sup>2</sup> ) | Annual Total Cost (KD) |
|----------------------------------|-------------|--------------|----------------|----------------------|----------------|------|------------------------------|---------------------|--------------------------------------------------------|------------------------------|------------------------|
|                                  | 2021        | 2021         | 2021           | 2021                 | 2021           | 2021 | 2021                         | 2021                | 2017-2021                                              | 2021                         | 2021                   |
| <b>A. Overhead Cost Centre</b>   |             |              |                |                      |                |      |                              |                     |                                                        |                              |                        |
| 1. Administration                | x           |              |                |                      |                |      |                              | x                   | x                                                      | x                            | x                      |
| 2. Nursing Admin                 | x           |              |                |                      |                |      |                              | x                   | x                                                      | x                            | x                      |
| 3. Medical Welfare               | x           |              |                |                      |                |      |                              | x                   | x                                                      | x                            | x                      |
| 4. Maintenance                   | x           |              |                |                      |                |      |                              | x                   | x                                                      | x                            | x                      |
| 5. Utility                       |             |              |                |                      |                |      |                              |                     |                                                        |                              | x                      |
| 6. Cleaning Services             | x           |              |                |                      |                |      |                              | x                   | x                                                      | x                            | x                      |
| 7. Security                      | x           |              |                |                      |                |      |                              | x                   | x                                                      | x                            | x                      |
| 8. General Store & Consumable    | x           |              |                |                      |                |      |                              | x                   | x                                                      | x                            | x                      |
| 9. IT Centre                     | x           |              |                |                      |                |      |                              | x                   | x                                                      | x                            | x                      |
| 10. Library                      | x           |              |                |                      |                |      |                              | x                   | x                                                      | x                            | x                      |
| 11. Tax and insurance            |             |              |                |                      |                |      |                              |                     |                                                        |                              | x                      |
| 12. Rent                         |             |              |                |                      |                |      |                              |                     |                                                        |                              | x                      |
| 13. CSSD                         | x           |              |                |                      |                |      |                              | x                   | x                                                      | x                            | x                      |
| 14. Dietetic                     | x           |              |                |                      |                |      |                              | x                   | x                                                      | x                            | x                      |
| 15. Medical record               | x           |              |                |                      |                |      |                              | x                   | x                                                      | x                            | x                      |
| 16. Laundry & Linen              | x           |              |                |                      |                |      |                              | x                   | x                                                      | x                            | x                      |
| 17. Telephone and Fax            |             |              |                |                      |                |      |                              |                     |                                                        |                              | x                      |
| 18. Others                       | x           |              |                |                      |                |      |                              | x                   | x                                                      | x                            | x                      |
| <b>Intermediate Cost Centers</b> | No of Staff | No of Nurses | Inpatient Days | Number of Discharges | Nos. of Visits | ALOS | Operating Cost (Exc. Salary) | Annual Staff Salary | Equipment /furnitures /Vehicles purchased last 5 Years | Floor Area (m <sup>2</sup> ) | Annual Total Cost (KD) |
| 19. Pharmacy & Drug              | x           |              |                |                      |                |      |                              | x                   | x                                                      | x                            | x                      |
| 20. Radiology                    | x           |              |                |                      |                |      |                              | x                   | x                                                      | x                            | x                      |
| 21. Laboratory                   | x           |              |                |                      |                |      |                              | x                   | x                                                      | x                            | x                      |
| 22. Physiotherapy                | x           |              |                |                      |                |      |                              | x                   | x                                                      | x                            | x                      |
| 23. ICU                          | x           | x            | x              | x                    |                | x    | x                            | x                   | x                                                      | x                            | x                      |
| 24. NICU/PICU                    | x           | x            | x              | x                    |                | x    | x                            | x                   | x                                                      | x                            | x                      |
| 25. CCU & CRW                    | x           | x            | x              | x                    |                | x    | x                            | x                   | x                                                      | x                            | x                      |
| 26. HDW-Medical                  | x           | x            | x              | x                    |                | x    | x                            | x                   | x                                                      | x                            | x                      |
| 27. HDW-General                  | x           | x            | x              | x                    |                | x    | x                            | x                   | x                                                      | x                            | x                      |
| 28. Operation Theatre            | x           | x            |                |                      |                |      |                              | x                   | x                                                      | x                            | x                      |
| 29. Operation Theatre (O&G)      | x           | x            |                |                      |                |      |                              | x                   | x                                                      | x                            | x                      |
| 30. Others                       | x           | x            | x              | x                    |                | x    | x                            | x                   | x                                                      | x                            | x                      |

| Final Cost Centers             | No of Staff | No of Nurses | Inpatient Days | Number of Discharges | Nos. of Visits | ALOS     | Operating Cost (Exc. Salary) | Annual Staff Salary | Equipment /furnitures /Vehicles purchased last 5 Years | Floor Area (m <sup>2</sup> ) | Annual Total Cost (KD) |
|--------------------------------|-------------|--------------|----------------|----------------------|----------------|----------|------------------------------|---------------------|--------------------------------------------------------|------------------------------|------------------------|
| <b>Inpatient Department</b>    |             |              |                |                      |                |          |                              |                     |                                                        |                              |                        |
| 31. Medicine                   | x           | x            | x              | x                    |                | x        | x                            | x                   | x                                                      | x                            | x                      |
| 32. Surgical                   | x           | x            | x              | x                    |                | x        | x                            | x                   | x                                                      | x                            | x                      |
| 33. Pediatric and Nursery      | x           | x            | x              | x                    |                | x        | x                            | x                   | x                                                      | x                            | x                      |
| 34. O & G                      | x           | x            | x              | x                    |                | x        | x                            | x                   | x                                                      | x                            | x                      |
| 35. Orthopedic                 | x           | x            | x              | x                    |                | x        | x                            | x                   | x                                                      | x                            | x                      |
| 36. Psychiatric                | x           | x            | x              | x                    |                | x        | x                            | x                   | x                                                      | x                            | x                      |
| 37. ENT                        | x           | x            | x              | x                    |                | x        | x                            | x                   | x                                                      | x                            | x                      |
| 38. Ophthalmology              | x           | x            | x              | x                    |                | x        | x                            | x                   | x                                                      | x                            | x                      |
| 39. Neurology & Neuro Surgical | x           | x            | x              | x                    |                | x        | x                            | x                   | x                                                      | x                            | x                      |
| 40. Dermatology                | x           | x            | x              | x                    |                | x        | x                            | x                   | x                                                      | x                            | x                      |
| 41. Urology                    | x           | x            | x              | x                    |                | x        | x                            | x                   | x                                                      | x                            | x                      |
| 42. Plastic Surgery            | x           | x            | x              | x                    |                | x        | x                            | x                   | x                                                      | x                            | x                      |
| 43. Radiotherapy & Oncology    | x           | x            | x              | x                    |                | x        | x                            | x                   | x                                                      | x                            | x                      |
| 44. Cardiothoracic             | x           | x            | x              | x                    |                | x        | x                            | x                   | x                                                      | x                            | x                      |
| 46. Respiratory                | x           | x            | x              | x                    |                | x        | x                            | x                   | x                                                      | x                            | x                      |
| 47. Rehabilitation             | x           | x            | x              | x                    |                | x        | x                            | x                   | x                                                      | x                            | x                      |
| 48. Others                     | x           | x            | x              | x                    |                | x        | x                            | x                   | x                                                      | x                            | x                      |
| <b>Outpatient Department</b>   |             |              |                |                      |                |          |                              |                     |                                                        |                              |                        |
| 49. A& E                       | x           | x            |                |                      | x              |          |                              | x                   | x                                                      | x                            | x                      |
| 50. Medicine Clinic            | x           | x            |                |                      | x              |          |                              | x                   | x                                                      | x                            | x                      |
| 51. Surgical Clinic            | x           | x            |                |                      | x              |          |                              | x                   | x                                                      | x                            | x                      |
| 52. Pediatric Clinic           | x           | x            |                |                      | x              |          |                              | x                   | x                                                      | x                            | x                      |
| 53. O & G Clinic               | x           | x            |                |                      | x              |          |                              | x                   | x                                                      | x                            | x                      |
| 54. Orthopedic Clinic          | x           | x            |                |                      | x              |          |                              | x                   | x                                                      | x                            | x                      |
| 55. Psychiatric Clinic         | x           | x            |                |                      | x              |          |                              | x                   | x                                                      | x                            | x                      |
| 56. ENT Clinic                 | x           | x            |                |                      | x              |          |                              | x                   | x                                                      | x                            | x                      |
| 57. Dermatology Clinic         | x           | x            |                |                      | x              |          |                              | x                   | x                                                      | x                            | x                      |
| 58. Ophthalmology Clinic       | x           | x            |                |                      | x              |          |                              | x                   | x                                                      | x                            | x                      |
| 59. Maxillo-facial Clinic      | x           | x            |                |                      | x              |          |                              | x                   | x                                                      | x                            | x                      |
| 60. Neurosurgery Clinic        | x           | x            |                |                      | x              |          |                              | x                   | x                                                      | x                            | x                      |
| 62. Hemodialysis               | x           | x            |                |                      | x              |          |                              | x                   | x                                                      | x                            | x                      |
| 63. Others                     | x           | x            |                |                      | x              |          |                              | x                   | x                                                      | x                            | x                      |
| <b>Total</b>                   | <b>x</b>    | <b>x</b>     | <b>x</b>       | <b>x</b>             | <b>x</b>       | <b>x</b> | <b>x</b>                     | <b>x</b>            | <b>x</b>                                               | <b>x</b>                     | <b>x</b>               |

Notes: CSSD (Central Sterile Supply Department), ICU (Intensive Care Unit), NICU (Neonatal Intensive Care Unit), PICU (Pediatric Intensive Care Unit), CCU (Coronary Care Unit), CRW (Coronary Recovery Ward), HDW (High Dependency Ward), O&G (Obstetric & Gynecology), ENT (Ear, Nose & Throat), A&E (Accident & Emergency), ALOS (Average Length of Stay)
